# Supplementary material for: Fe3O4 and Au nanoparticles dispersed on the graphene support as a highly active catalyst toward the reduction of 4-nitrophenol
Source: Royal Society of Chemistry journal article supplement (doi:10.1039/c5cp05336f), 2015-11-16
Supplement: c5cp05336f1.pdf [file c5cp05336f1.pdf]

## Supporting information

### **Fe<sub>3</sub>O<sub>4</sub> and Au nanoparticles dispersed on graphene support as a highly active catalyst toward the reduction of 4-nitrophenol**

*Yan Wang,\* Hai Li, Jijun Zhang, Xinyu Yan, and Zexiang Chen\**

School of Opto-electronic Information, University of Electronic Science and  
Technology of China, 610054 Chengdu, China

E-mail address: [wangyan127@uestc.edu.cn](mailto:wangyan127@uestc.edu.cn); [zxchen@uestc.edu.cn](mailto:zxchen@uestc.edu.cn)

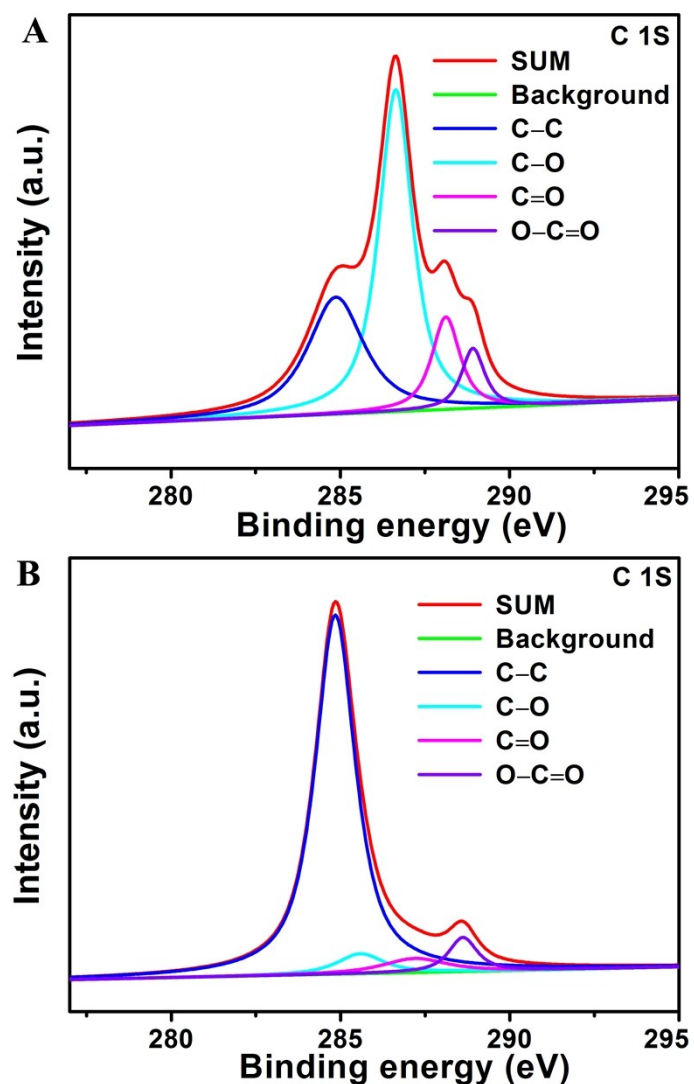

**Fig. S1.** XPS C1s spectrum of GO (A) and rGO/Fe<sub>3</sub>O<sub>4</sub>/Au (B).

**Fig. S1** gives deconvolution of the XPS C1s core-level spectrum of rGO/Fe<sub>3</sub>O<sub>4</sub>/Au and GO. Compared with GO in **Fig. S1**, the increased area proportion of the peak, which is due to the contributions from the C-C peak (284.8 eV), while the peak intensities of oxidized carbon, especially the peak of C-O decrease dramatically, indicating that GO has been well deoxygenated to form graphene. However, there are still some residual oxygen-containing functionalities on the graphene sheets due to the incomplete reduction.

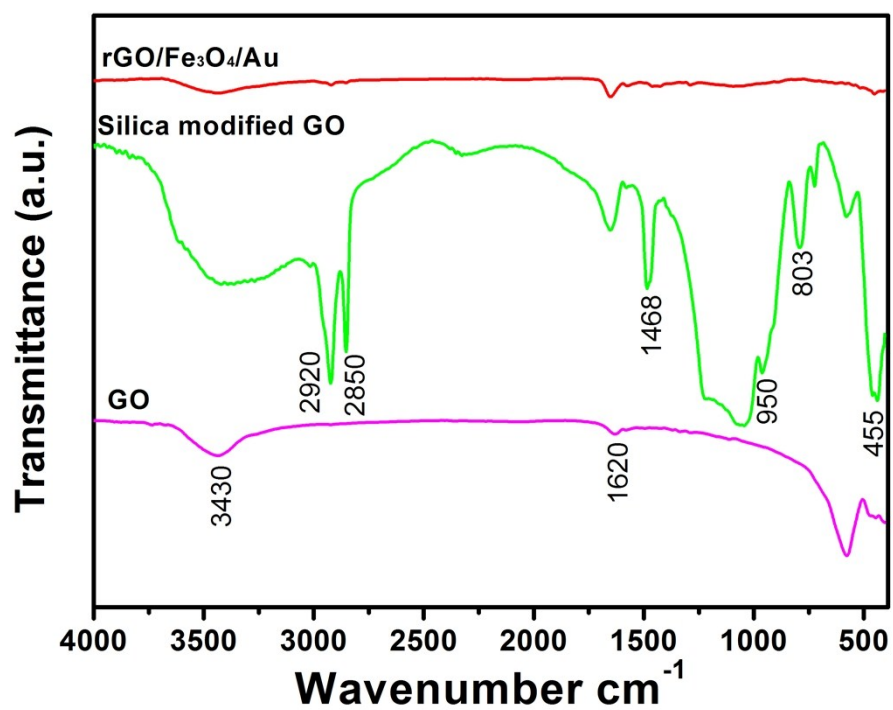

**Fig. S2.** FT-IR spectra of GO, silica modified GO, and rGO/Fe<sub>3</sub>O<sub>4</sub>/Au.
